# Supplementary material for: Estimation of Water Quality Parameters through a Combination of Deep Learning and Remote Sensing Techniques in a Lake in Southern Chile
Source: MDPI journal article supplement (doi:10.3390/rs15174157), 2023-08-24
Supplement: s1 [file s1]

## Supporting Information

Table S1. Satellite Images characteristics

| N  | L8 Image ID                                  | Path/R<br>ow | Year | In<br>situ<br>Date             | Image Date | Days<br>differences    |
|----|----------------------------------------------|--------------|------|--------------------------------|------------|------------------------|
| 1  | LC08_L1TP_233089_20170306_2020090<br>5_02_T1 | 233/89       | 2017 | 13, 14,<br>15<br>Mar.          | 06 Mar.    | 7, 8, 9                |
| 2  | LC08_L1TP_233089_20170728_2020090<br>3_02_T1 | 233/89       | 2017 | 1, 2<br>Aug.                   | 28 Jul.    | 5,6                    |
| 3  | LC08_L1TP_233089_20180325_2020090<br>1_02_T1 | 233/89       | 2018 | 13, 14,<br>15<br>Mar.          | 25 Mar.    | 8, 9, 10               |
| 4  | LC08_L1TP_233089_20190803_2020082<br>7_02_T1 | 233/89       | 2019 | 5-<br>7Aug.                    | 03 Aug.    | 3, 4, 5                |
| 5  | LC08_L1TP_233089_20200227_2020082<br>2_02_T1 | 233/89       | 2020 | 12, 13<br>Feb.                 | 27 Feb.    | 14,13                  |
| 6  | LC08_L1TP_233089_20200314_2020082<br>2_02_T1 | 233/89       | 2020 | 10, 11<br>Mar.                 | 14 Marz.   | 5,6                    |
| 7  | LC08_L1TP_233089_20200906_2020091<br>8_02_T1 | 233/89       | 2020 | 24-27<br>Aug.<br>14, 15<br>Sep | 06 Sep.    | 11, 12, 13<br><br>9,10 |
| 8  | LC08_L1TP_233089_20201125_2021031<br>6_02_T1 | 233/89       | 2020 | 16, 17<br>Nov.                 | 25 Nov.    | 9,10                   |
| 9  | LC08_L1TP_233089_20210112_2021030<br>8_02_T1 | 233/89       | 2021 | 18, 19<br>Jan.                 | 12 Jan.    | 7,8                    |
| 10 | LC08_L1TP_233089_20210317_2021032<br>8_02_T1 | 233/89       | 2021 | 16, 17<br>Mar.                 | 17 Mar.    | 0,1                    |
| 11 | LC08_L1TP_233089_20210504_2021051<br>7_02_T1 | 233/89       | 2021 | 11,12<br>May                   | 04 May.    | 8,9                    |
| 12 | LC08_L1TP_233089_20210605_2021061<br>4_02_T1 | 233/89       | 2021 | 15,16<br>Jun.                  | 05 Jun.    | 11,12                  |
| 13 | LC08_L1TP_233089_20210723_2021072<br>9_02_T1 | 233/89       | 2021 | 13, 14<br>Jul.                 | 23 Jul.    | 11,12                  |
| 14 | LC08_L1TP_233089_20210808_2021081<br>9_02_T1 | 233/89       | 2021 | 9,10<br>Aug.                   | 08 Aug.    | 1,2                    |

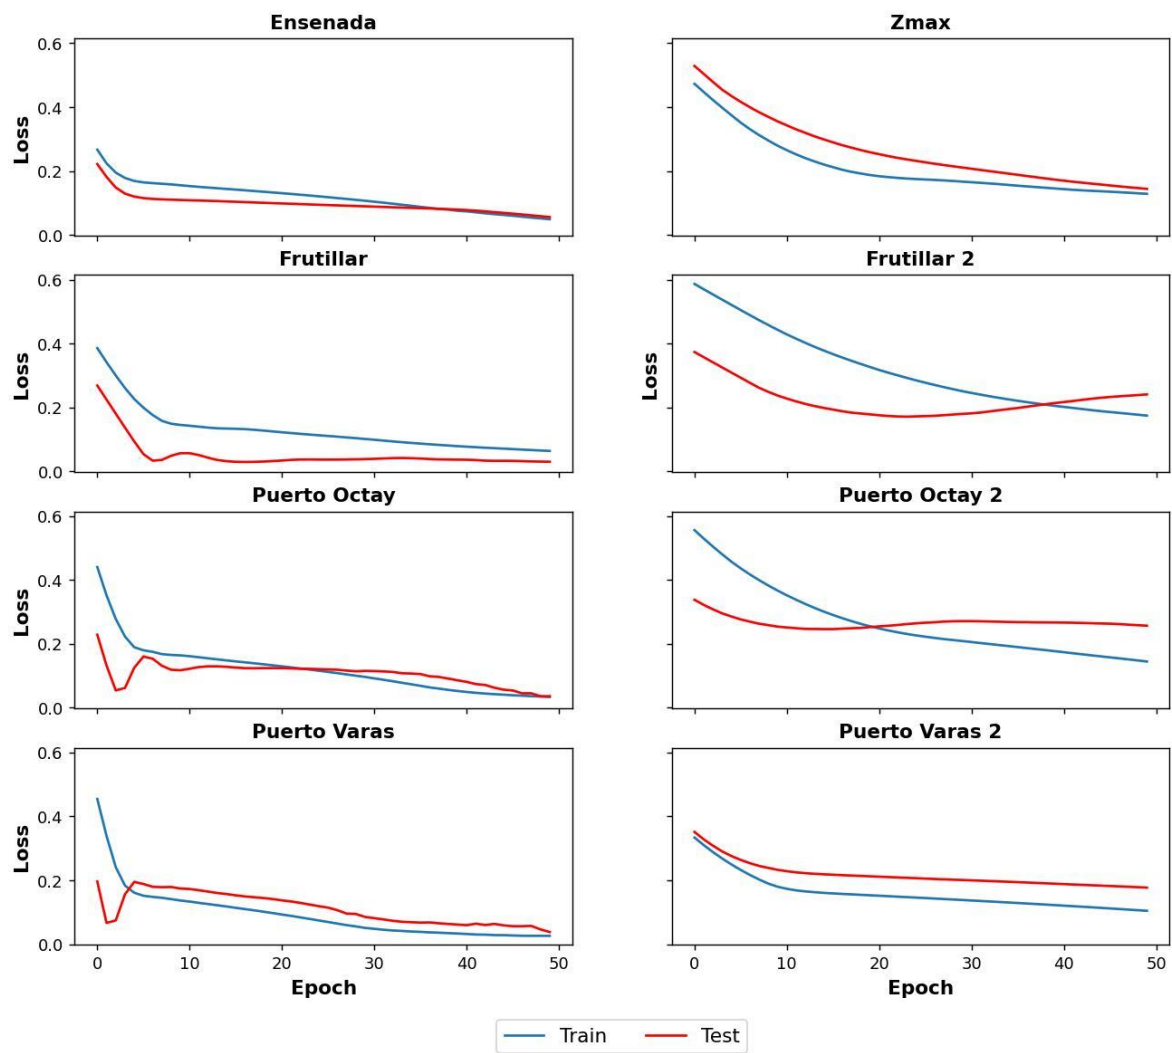

Figure S1. Error Case A, LSTM model



Figure S2. Error Case A RNN network.

Table S2. Behavior of limnological parameters in the Lake Llanquihue

| Parameters   | Statistics | Summer |       |      |       |       |       |       |       | Autumn |      |      |      | Winter |       |      |       |       |       |       |       | Spring |       |      |       |
|--------------|------------|--------|-------|------|-------|-------|-------|-------|-------|--------|------|------|------|--------|-------|------|-------|-------|-------|-------|-------|--------|-------|------|-------|
|              |            | LI-1   | LI-2  | LI-3 | LI-4  | LI-5  | LI-6  | LI-7  | LI-8  | LI-1   | LI-3 | LI-5 | LI-7 | LI-1   | LI-2  | LI-3 | LI-4  | LI-5  | LI-6  | LI-7  | LI-8  | LI-1   | LI-3  | LI-5 | LI-7  |
| Chl-a (ug/L) | Average    | 0.7    | 0.8   | 0.5  | 0.8   | 0.5   | 0.7   | 0.7   | 1.2   | 0.9    | 0.9  | 0.8  | 0.8  | 1.3    | 1.2   | 1.5  | 1.2   | 1.5   | 1.6   | 1.3   | 1.1   | 0.5    | 0.5   | 0.5  | 0.5   |
|              | Max        | 2.5    | 1.7   | 2.2  | 1.5   | 1.8   | 2.2   | 2.4   | 1.6   | 1.7    | 2    | 1.4  | 1.9  | 2.6    | 1.4   | 2.9  | 1.4   | 3.2   | 2.5   | 3.3   | 2     | 1      | 1.4   | 1.4  | 1.4   |
|              | Min        | 0.2    | 0.2   | 0.1  | 0.4   | 0.1   | 0.3   | 0.1   | 0.5   | 0.5    | 0.4  | 0.5  | 0.4  | 0.3    | 0.7   | 0.6  | 0.8   | 0.6   | 0.8   | 0.3   | 0.5   | 0.1    | 0.1   | 0.1  | 0.1   |
|              | SD         | 0.5    | 0.5   | 0.5  | 0.4   | 0.5   | 0.6   | 0.6   | 0.4   | 0.4    | 0.4  | 0.2  | 0.4  | 0.6    | 0.3   | 0.6  | 0.2   | 0.6   | 0.6   | 0.7   | 0.6   | 0.3    | 0.4   | 0.3  | 0.3   |
|              | CV(%)      | 0.8    | 0.6   | 0.9  | 0.5   | 0.8   | 0.8   | 0.9   | 0.4   | 0.4    | 0.5  | 0.3  | 0.5  | 0.5    | 0.2   | 0.3  | 0.1   | 0.4   | 0.4   | 0.5   | 0.5   | 0.5    | 0.7   | 0.7  | 0.6   |
|              | n          | 24     | 10    | 24   | 11    | 22    | 14    | 28    | 4     | 20     | 20   | 18   | 18   | 21     | 5     | 21   | 5     | 22    | 5     | 22    | 5     | 24     | 21    | 22   | 26    |
| PT (ug/L)    | Average    | 8.5    | 0.04  | 7.8  | 0.4   | 6.7   | 0.03  | 4.9   | 0.1   | 10.6   | 12.1 | 9.2  | 10.2 | 7      | 1.3   | 6.9  | 0.9   | 6.8   | 0.8   | 8.3   | 1.2   | 6.3    | 6.1   | 6.7  | 6.1   |
|              | Max        | 31     | 0.3   | 36.6 | 3     | 25    | 0.2   | 41    | 0.3   | 48     | 56   | 40.9 | 42.3 | 14.8   | 5.9   | 14.9 | 3     | 44    | 3     | 49.7  | 4.1   | 16     | 15    | 35.5 | 14    |
|              | Min        | 2      | 0.003 | 2    | 0.003 | 0.002 | 0.003 | 0.003 | 0.003 | 3      | 1    | 1    | 1    | 1      | 0.005 | 1    | 0.009 | 0.001 | 0.004 | 0.003 | 0.004 | 2      | 1     | 1.3  | 0.003 |
|              | SD         | 7.1    | 0.1   | 9.2  | 0.9   | 6.2   | 1.03  | 7.9   | 0.1   | 8.7    | 11.6 | 8.5  | 9.1  | 3.8    | 2.3   | 3.9  | 1.4   | 7.5   | 1.4   | 10.8  | 1.8   | 4.3    | 3.6   | 6.9  | 4.1   |
|              | CV(%)      | 0.8    | 2.1   | 1.1  | 2.6   | 0.9   | 35.5  | 1.6   | 1.7   | 0.8    | 0.9  | 0.9  | 0.9  | 0.5    | 1.8   | 0.5  | 1.7   | 1.1   | 1.7   | 1.3   | 1.5   | 0.7    | 0.6   | 1.03 | 0.6   |
|              | n          | 26     | 13    | 26   | 18    | 24    | 18    | 33    | 8     | 22     | 22   | 22   | 22   | 32     | 7     | 30   | 7     | 34    | 7     | 34    | 6     | 28     | 26    | 28   | 29    |
| NT (mg/L)    | Average    | 0.06   | 0.06  | 0.02 | 0.02  | 0.05  | 0.05  | 0.05  | 0.06  | 0.11   | 0.07 | 0.07 | 0.08 | 0.05   | 0.05  | 0.05 | 0.05  | 0.06  | 0.06  | 0.09  | 0.04  | 0.1    | 0.1   | 0.09 | 0.08  |
|              | Max        | 0.2    | 0.2   | 0.1  | 0.1   | 0.1   | 0.1   | 0.1   | 0.1   | 0.6    | 0.17 | 0.17 | 0.19 | 0.1    | 0.1   | 0.13 | 0.13  | 0.16  | 0.16  | 0.16  | 0.06  | 0.2    | 0.3   | 0.2  | 0.19  |
|              | Min        | 0.01   | 0.01  | 0.01 | 0.01  | 0.02  | 0.02  | 0.02  | 0.02  | 0.02   | 0.03 | 0.03 | 0.02 | 0.01   | 0.01  | 0.01 | 0.01  | 0.01  | 0.01  | 0.04  | 0.01  | 0.02   | 0.003 | 0.02 | 0.02  |
|              | SD         | 0.07   | 0.07  | 0.05 | 0.05  | 0.04  | 0.04  | 0.04  | 0.04  | 0.12   | 0.04 | 0.05 | 0.05 | 0.04   | 0.04  | 0.05 | 0.05  | 0.06  | 0.06  | 0.06  | 0.02  | 0.05   | 0.05  | 0.05 | 0.05  |
|              | CV(%)      | 1.14   | 1.15  | 1    | 1     | 0.9   | 0.9   | 0.8   | 0.7   | 1.09   | 0.6  | 0.6  | 0.67 | 0.7    | 0.7   | 0.9  | 0.9   | 1.13  | 1.13  | 0.6   | 0.7   | 0.45   | 0.5   | 0.5  | 0.67  |
|              | n          | 6      | 7     | 5    | 5     | 6     | 7     | 6     | 4     | 24     | 18   | 21   | 28   | 5      | 5     | 5    | 5     | 4     | 4     | 3     | 3     | 33     | 34    | 32   | 28    |
| SD (m)       | Average    | 14.3   | 15.5  | 16.8 | 15    | 16    | 15.3  | 17.5  | 17.8  | 14.7   | 16.3 | 14.1 | 18   | 14     | 13.9  | 13.4 | 14.6  | 11.4  | 13    | 17.9  | 14.1  | 15.2   | 15.1  | 14.4 | 19.3  |
|              | Max        | 20.8   | 20.5  | 23.2 | 17.5  | 23.8  | 21    | 30    | 24.5  | 19     | 22.5 | 20   | 30   | 19     | 16    | 19   | 17    | 15.5  | 18    | 30    | 17    | 19     | 19    | 18   | 30    |
|              | Min        | 9.5    | 11    | 11.7 | 13    | 11    | 11.5  | 10    | 12    | 11     | 12.2 | 9.5  | 12   | 9.5    | 11.5  | 9.5  | 9.5   | 6     | 9     | 11    | 12    | 12     | 12.5  | 12   | 13.5  |
|              | SD         | 2.5    | 3.4   | 2.9  | 1.58  | 3.38  | 3.13  | 4.25  | 4.19  | 2.5    | 3.2  | 3.8  | 5.9  | 2.8    | 1.91  | 2.5  | 2.7   | 2.4   | 3.3   | 4.39  | 2.4   | 2.3    | 1.7   | 1.6  | 4.5   |
|              | CV(%)      | 0.17   | 0.21  | 0.17 | 0.1   | 0.2   | 0.2   | 0.24  | 0.2   | 0.17   | 0.19 | 0.2  | 0.3  | 0.19   | 0.13  | 0.19 | 0.19  | 0.2   | 0.2   | 0.2   | 0.17  | 0.15   | 0.11  | 0.11 | 0.2   |
|              | n          | 32     | 16    | 34   | 18    | 30    | 20    | 45    | 10    | 26     | 30   | 22   | 28   | 26     | 8     | 30   | 8     | 30    | 7     | 32    | 6     | 30     | 32    | 30   | 35    |
| T (°C)       | Average    | 17.6   | 17.5  | 17.4 | 17.3  | 16.8  | 17.3  | 17.5  | 17.4  | 13.8   | 13.8 | 13.9 | 14   | 10.7   | 11.1  | 10.7 | 10.9  | 10.7  | 10.8  | 10.7  | 11.1  | 12.5   | 12.4  | 12.4 | 12.6  |
|              | Max        | 20     | 19.1  | 19.3 | 17.9  | 19.2  | 17.8  | 19.6  | 18    | 14.9   | 15   | 15.7 | 15.9 | 11.7   | 11.5  | 12   | 11.5  | 11.7  | 11.6  | 11.8  | 11.6  | 14.5   | 14.1  | 14.2 | 15    |
|              | Min        | 16.5   | 16.4  | 16.4 | 16.2  | 15.2  | 16.3  | 15.7  | 16.4  | 12.7   | 12.8 | 12.4 | 12.6 | 10.1   | 10.7  | 10   | 10.6  | 10.3  | 10.3  | 10.4  | 1.6   | 9.8    | 9.6   | 10.1 | 10.6  |
|              | SD         | 1.03   | 0.8   | 0.8  | 0.5   | 0.9   | 0.46  | 0.8   | 0.6   | 0.7    | 0.7  | 0.9  | 0.9  | 0.3    | 0.3   | 0.4  | 0.3   | 0.3   | 0.3   | 0.3   | 0.3   | 1.3    | 1.04  | 1.04 | 1.3   |
|              | CV(%)      | 0.05   | 0.04  | 0.04 | 0.03  | 0.05  | 0.02  | 0.04  | 0.03  | 0.05   | 0.05 | 0.06 | 0.06 | 0.03   | 0.02  | 0.03 | 0.02  | 0.03  | 0.03  | 0.03  | 0.03  | 0.1    | 0.08  | 1.04 | 0.1   |
|              | n          | 15     | 8     | 15   | 10    | 16    | 10    | 23    | 5     | 13     | 13   | 11   | 12   | 17     | 7     | 16   | 7     | 17    | 8     | 21    | 6     | 16     | 15    | 16   | 16    |
